# Supplementary material
Source: PubMed Central journal article supplement (PMC7329920)

Suppl. Fig. 2

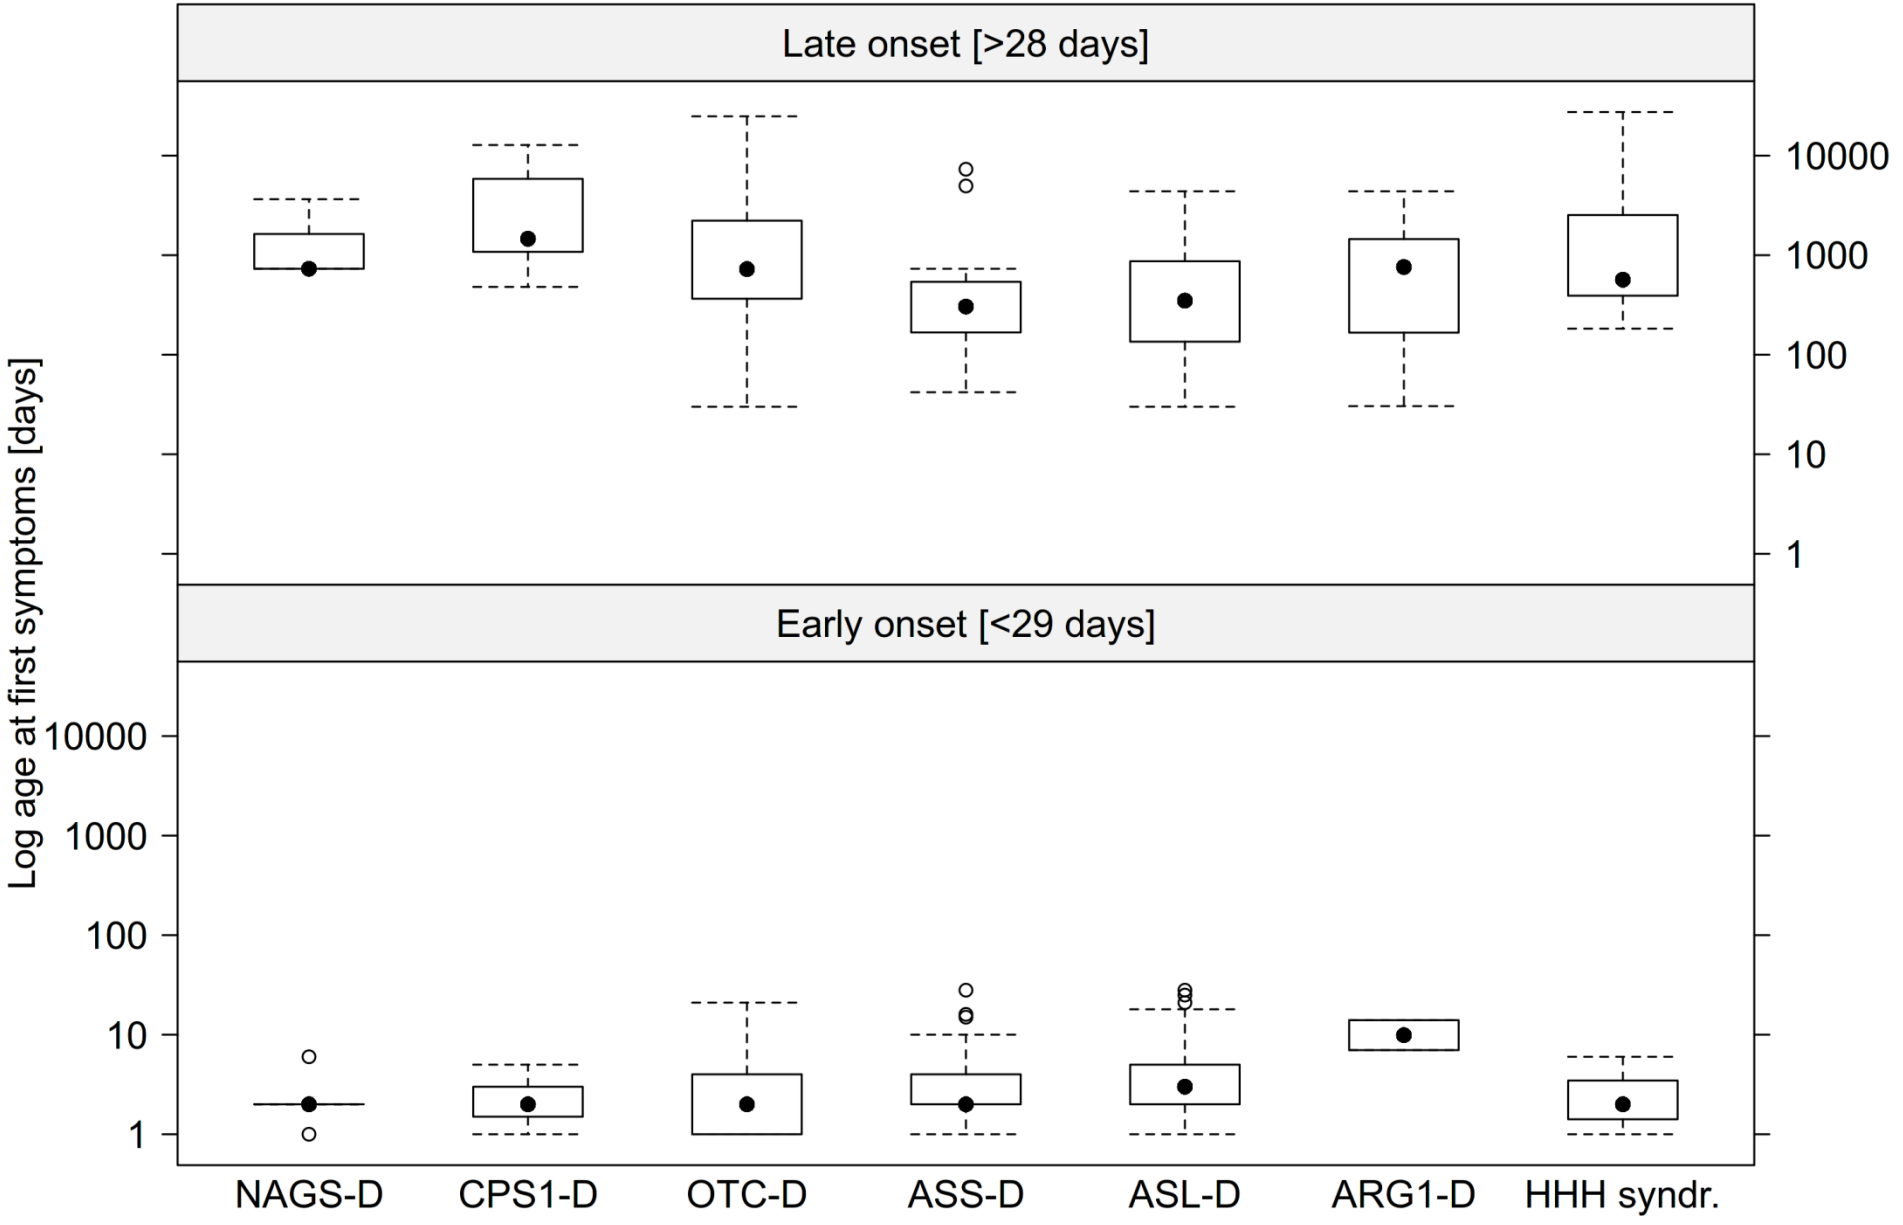

Supplement: NIHMS1588928-supplement-Suppl__Figures.pdf [file NIHMS1588928-supplement-Suppl__Figures.pdf]
